1 **A roadmap for navigating partner engagement in community-based autopsy studies:**

2 **Lessons from the field in rural KwaZulu-Natal, South Africa**

3

4 Alison Castle<sup>1,2,3\*\*#</sup>, Gugu Shazi<sup>1\*</sup>, Threnesan Naidoo<sup>1</sup>, Ashendree Govender<sup>1</sup>, Nceba Gqaleni<sup>1</sup>,

5 Emily B. Wong<sup>1,4</sup>, Collins Iwuji<sup>1,5</sup>, Kobus Herbst<sup>1,6</sup>, Adrie JC Steyn<sup>1,7</sup>, Mark J. Siedner<sup>1,2,3</sup>.

6

7 \*These authors provided equal contributions

8 #Corresponding author: [accastle@mgb.org](mailto:accastle@mgb.org)

9

10

11 <sup>1</sup>Africa Health Research Institute, University of KwaZulu-Natal, Durban, South Africa

12 <sup>2</sup>Division of Infectious Diseases, Massachusetts General Hospital, Boston, Massachusetts,

13 United States of America

14 <sup>3</sup>Harvard Medical School, Boston, Massachusetts, United States of America

15 <sup>4</sup>Heersink School of Medicine, University of Alabama at Birmingham, Birmingham, Alabama,

16 United States of America

17 <sup>5</sup>Dept of Global Health and Infection, Brighton and Sussex Medical School, University of

18 Sussex, Brighton, United Kingdom.

19 <sup>6</sup>DSI-SAMRC South African Population Research Infrastructure Network, South Africa Medical

20 Research Council, Durban, South Africa

21 <sup>7</sup>Department of Microbiology, University of Alabama at Birmingham, Birmingham, Alabama,

22 United States of America

23

24

25

26 **Abstract** (word count: 349)

27

28 **Background**

29 The measurement of cause-specific mortality is critical for health system planning but remains a  
30 challenge in many low-resource settings due to societal, legal, and logistical barriers. We  
31 present a co-development process with community members for the design and implementation  
32 of an autopsy program to improve cause of death data in a historically underserved population.

33

34 **Methods**

35 We sought to develop an autopsy program at the Africa Health Research Institute (AHRI) Health  
36 and Demographic Surveillance Site (HDSS). The project proposes to obtain consent from  
37 families of deceased adults, to perform diagnostic autopsies by a trained pathologist, and to  
38 process samples to determine causes of death. Prior to launching the program, we engaged key  
39 partners in learning their perspectives about such a program and understanding the landscape  
40 of challenges needed for successful implementation. Herein, we describe lessons from  
41 interactions with these partners, including 1) the AHRI community advisory board (CAB), 2) the  
42 South Africa Department of Health (SA DoH), 3) local traditional authorities, 4) funeral home  
43 personnel, 5) traditional healers, and 6) healthcare providers. We also detail the development of  
44 community outreach efforts used to inform the public about the program.

45

46 **Results**

47 The partners provided valuable feedback on the study design and informed us of issues that  
48 needed to be addressed: community concerns about organ retention and sale (CAB),  
49 implications of how autopsy findings could spur litigation and erode trust in healthcare providers  
50 who determined alternate causes of death (SA DoH), a cultural practice that conflicts with the  
51 autopsy procedure (traditional healers), the need to educate families before they engage with

52 funeral businesses (funeral homes), and enhancing our death referral network through  
53 healthcare providers. This led to protocol changes and an adapted community engagement  
54 strategy, which included educating healthcare providers, hosting community dialogs,  
55 broadcasting radio advertisements, and developing a film to describe autopsy procedures to  
56 families considering participation.

57

## 58 **Conclusions**

59 We present a comprehensive model of partner engagement for a community-based autopsy  
60 program in South Africa, leading to the co-development of a program that incorporates local  
61 customs around death while promoting buy-in and support from the government, civil society,  
62 and medical partners.

63

64 **Keywords:** Autopsy, Implementation, Community Partners, South Africa

65

## 66 **Introduction**

67 Accurate identification of the leading causes of death is crucial for effective health system  
68 planning and resource allocation. In rural South Africa, as in other low- and middle-income  
69 countries, the collection of accurate mortality data is limited by a scarcity of postmortem data.(1)  
70 Modeling studies such as the Global Burden of Disease Study, which use risk factors to  
71 estimate mortality in areas with limited data, suggest that HIV/AIDS is a leading cause of death  
72 in the country.(2) Yet, more recent data suggest that this trend may be changing.(3) The  
73 widespread adoption of antiretroviral therapy has led to a notable decline in deaths due to  
74 HIV.(3) However, the leading causes of death emerging from this epidemiological shift remain  
75 obscure, largely due to incomplete or inaccurate death registries that do not reflect directly  
76 measured causes of mortality.(4, 5)

77

78 In settings where cause-of-death information is limited and where most deaths occur outside  
79 healthcare facilities, verbal autopsy has emerged as a common method for determining  
80 population-based, cause-specific mortality.(6) Verbal autopsies are used by multiple  
81 demographic health and surveillance sites and have been shown to have favorable validity for  
82 accidents, trauma, and infectious disease causes of death.(7) However, for deaths related to  
83 cardiovascular disease or cancer, verbal reports have poor sensitivity and specificity,  
84 particularly in settings where diagnostic infrastructure for those conditions is lacking.(7)

85

86 To address this knowledge gap, we are developing a pathologic autopsy program within a rural  
87 Health and Demographic Surveillance Site (HDSS) in KwaZulu-Natal, South Africa,  
88 encompassing 150,000 individuals. The objectives of the pathologic autopsy program are 1) to  
89 determine the leading causes of death among adults in rural KwaZulu-Natal in the era of  
90 widespread antiretroviral therapy availability and declining HIV mortality(8, 9); 2) to evaluate the  
91 validity and determine the optimal use of verbal autopsy-based tools; and 3) to provide the

92 health department with high-quality cause of death and burden of disease data to inform policy.  
93 Although complete diagnostic autopsies are considered the gold standard for determining the  
94 cause of death, such practices have been historically challenged in resource-limited settings  
95 due to the lack of histologic laboratory infrastructure and skilled personnel.(6) Our initiative in  
96 South Africa aims to overcome these challenges by leveraging a robust research infrastructure,  
97 including diagnostic testing, tissue storage, and the expertise of trained pathologists and  
98 prosecutors, in partnership with a longstanding HDSS survey with comprehensive risk factor  
99 data.(10, 11)

100

101 In preparation for the introduction of this program, we met with a diverse set of public, civil  
102 society, and medical stakeholders to learn about preferences for and challenges to its  
103 implementation. We recognized the many cultural and religious beliefs that often pose  
104 challenges to conducting postmortem examinations, which involve complex discussions with  
105 family members after the loss of a loved one and examination of the external and internal body  
106 with invasive sampling to obtain tissue for microscopy.(6) In South Africa, many sociocultural  
107 barriers to autopsy, such as gendered power dynamics, traditional and religious belief systems,  
108 and a lack of trust in the healthcare system, have been reported.(12) Herein, we describe  
109 feedback provided by program partners that we hope will offer insights into the establishment of  
110 autopsy programs in similar contexts.

111

## 112 **Methods**

### 113 **Study Setting**

114 This work was conducted at the Africa Health Research Institute's (AHRI) Health and  
115 Demographic Surveillance Site embedded within the Hlabisa subdistrict of KwaZulu-Natal,  
116 South Africa. Since the initiation of AHRI's verbal autopsy program, we have observed over  
117 2,550,000 person-years and recorded over 24,000 deaths.(13) Annual household surveys

118 capture data on migration, household wealth, use of healthcare services, and clinical testing for  
119 prevalent diseases such as HIV, tuberculosis, hypertension, and diabetes. The population  
120 remains one of the world's most intensely HIV-affected regions, with more than 34% of the  
121 population living with HIV.(10) Due to tremendous public health efforts that have increased  
122 access to antiretroviral therapy, more than three-quarters of those with HIV have controlled  
123 disease with suppressed viral loads.(9) Most residents live beneath the South African poverty  
124 line in rural or peri-urban areas, with an overall life expectancy of 56.1 years.(14) Within this  
125 community, medical pluralism is common, and many individuals consult traditional healers  
126 before seeking care at Department of Health facilities.(15, 16)

127

### 128 **Initial Proposed Autopsy Study Design by the Research Team**

129 The outline of a community-based pathologic autopsy program was presented to members of  
130 the community and was iteratively refined (**Figure 1**). Eligible participants for the autopsy study  
131 include deceased residents of the HDSS aged 18 years or older. The pathologic autopsy  
132 program would be offered to families of all deceased adults who meet eligibility criteria.  
133 Recruitment would be facilitated through funeral homes. Upon notification of a death from the  
134 funeral home or interested family, the project coordinator would contact the family and establish  
135 an in-person meeting to discuss the study. Informed consent would be obtained from the next of  
136 kin in accordance with the South African National Health Act (17) at a location chosen by the  
137 family, which could be the funeral home or the family's residence.

138

### 139 **Figure 1: Collaborative Framework for Protocol Development and Implementation.**

140 This diagram outlines the comprehensive approach taken by the research team at the Africa  
141 Health Research Institute (AHRI). It highlights the initial proposal design with the Department of  
142 Health, University KwaZulu-Natal Biomedical Research Ethics Committee, and the community  
143 advisory board. It then shows progression through the extensive community and institutional

144 engagement process involving traditional authorities, funeral homes, healthcare workers, civic  
145 society, the police department, environmental services, and forensic pathology. The figure  
146 illustrates the iterative process of refining protocols, informed consent, and educational  
147 materials through pilot experiences with families and community partners.

148

#### 149 **Additional proposed study procedures**

150 Following receipt of informed consent from the family, the study pathologist would perform the  
151 autopsy at the affiliated funeral home, adhering to any family requests regarding the extent of  
152 the procedure or specific organ sampling for analysis. Tissue processing and storage would be  
153 performed at AHRI's laboratory in Durban. Families would receive autopsy results after 12 to 16  
154 weeks, which include the most likely cause of death and contributing causes. A verbal autopsy,  
155 which occurs at 12 weeks after a death within the HDSS protocol, would then be conducted at a  
156 separate time with the closest relative before disclosure of the final pathologic autopsy results.

157

#### 158 **Partner Engagement Methods for Iterative Refinement of the Autopsy Study**

159 This study was designed to incorporate the perspectives and expertise of diverse groups,  
160 including the Africa Health Research Institute's Community Advisory Board (CAB), the  
161 University of KwaZulu-Natal's Biomedical Research Ethics Board (BREC), the Department of  
162 Health officials, local traditional authorities, funeral home personnel, traditional healers, the  
163 South African Police, Civil Society community leaders, and healthcare providers associated with  
164 AHRI and the Department of Health.

165

166 Our engagement approach varied by partner type to maximize accessibility and participation.  
167 The AHRI Public Engagement Team facilitated meetings with key partners such as traditional  
168 authorities, the Department of Health, and civil society leaders. Our engagement with traditional  
169 healers was facilitated by the Traditional Medicine Faculty at AHRI. For funeral home

170 engagement, we conducted a comprehensive search to identify every funeral home within the  
171 region, followed by in-person appointments with each facility.

172

173 Recommendations for key concepts to address and findings from each partner, as well as  
174 resulting protocol adaptations made in response to their input, are summarized below and in

175 **Table 1.**

176

177 *Africa Health Research Institute's Community Advisory Board (CAB)*

178 We initiated our engagement process by conducting meetings with the Africa Health Research  
179 Institute's Community Advisory Board (CAB), an official oversight body that evaluates study  
180 designs in parallel to the Biomedical Research Ethics Committee (BREC). The CAB, which  
181 convenes monthly, plays a pivotal role in representing community interests and ensuring ethical  
182 research practices. The 25 members are elected every three years and receive comprehensive  
183 three-day training on roles, responsibilities, and AHRI's research activities. The CAB enables  
184 community members to express any questions or concerns about the institute's research prior  
185 to and throughout the duration of community-based projects.

186

187 The CAB was instrumental in educating our research team about various cultural, traditional,  
188 and community norms that could influence engagement with the autopsy program. They brought  
189 to our attention considerations about local beliefs, such as ukuthakatha or witchcraft, and how  
190 they might intersect with our research objectives. For example, if a person was believed to have  
191 been the target of witchcraft, family members may seek information about how it may have  
192 contributed to the participant's demise. We addressed this concern by including language in our  
193 consent forms and study information materials that the procedure would only detect the medical  
194 diagnoses that may have contributed to death.

195



196 The CAB was supportive of the study's objectives. However, they emphasized the need to time  
197 autopsy procedures considering local burial customs, which typically occur within a week of  
198 death. Acknowledging this, we ensured that our consent process explained that we would strive  
199 to accommodate the time-sensitive burial proceedings and that families may want to decline if  
200 there was a risk that it would delay burial plans. We also clarified that there would be no  
201 additional costs to the family if they chose to wait until the autopsy procedure could be  
202 completed before burial. Additionally, the CAB members raised a common misconception that  
203 forensic pathologists remove all organs during autopsies and replace them with cotton, which  
204 conflicts with the local tradition of burying a person "whole".(12) We proactively addressed this  
205 by clarifying that we do not replace organs with cotton or remove full organs in our community  
206 outreach methods. Finally, the CAB helped us refine communication strategies, such as the  
207 wording used in radio broadcasts and other public communications, to ensure a high degree of  
208 cultural sensitivity (**Figures 2,3**).

209

210 **Figure 2: Participant-facing flyer for Study Outreach and Engagement. (English version)**

211 This flyer, designed by the Africa Health Research Institute's Pathologic Autopsy Research  
212 Program, is addressed to families who may be left with questions after a family member is  
213 deemed to have died from natural causes. It raises awareness about the autopsy program goals  
214 and invites community members to seek more information through the contact details for the  
215 program coordinator.

216

217 **Figure 3: Educational Flyer for the Pathologic Autopsy Program (English version)**

218 This poster explains the concept, purpose, and process of a pathologic autopsy. It addresses  
219 common questions raised by our community partners. A diagram illustrates the step-by-step  
220 procedure and concludes with the contact information of the study coordinator.

221

222 *University of KwaZulu-Natal's Biomedical Research Ethics Board (BREC)*

223 The Biomedical Research Ethics Board provided ethical review of our protocol and consent  
224 forms. Feedback from this group resulted in our study adopting a separate consent form for  
225 tissue storage and future use of biological samples. Additionally, to ensure compliance with  
226 confidentiality standards, the input from the ethics committee led us to establish an independent  
227 consent process for collecting contact information from potentially eligible and interested  
228 families at the funeral homes. To do so, we created a document capturing the name and contact  
229 information of an interested family member, which was provisioned in each of the funeral home  
230 businesses. We were also asked to provide our study personnel with specialized training in 1)  
231 ethical consent practices for the recruitment of recently bereaved families and 2) the  
232 management of emotional stress among study staff. The training was provided by the staff  
233 psychologist at AHRI psychologist. Standing team debriefing sessions with the verbal autopsy  
234 nurses and pathologic autopsy nurse were scheduled.

235

236 *Department of Health*

237 Discussions with the Department of Health were crucial to align the study procedures with local  
238 health regulations. During these meetings, district and provincial officials were consulted to  
239 delineate the scope of our autopsies, ensuring that they were clearly defined as examinations  
240 for natural causes of death and thus would not interfere with forensic pathology services, which  
241 are legally mandated for deaths suspected to be unnatural.(18) Natural deaths are defined as  
242 deaths related to internal bodily events not influenced by external occurrences, such as suicide,  
243 homicide, or trauma. Furthermore, if the study pathologist identified findings concerning an  
244 unnatural death, the deceased would be immediately transferred to police custody as  
245 sanctioned by the Department of Health. This change was adapted to our protocol as well as to  
246 AHRI's Memorandum of Agreement with the Department of Health.

247

248 Several additional unforeseen concerns also surfaced in discussions with the Department of  
249 Health. For example, they queried whether autopsy results could be used in legal action against  
250 healthcare providers for misdiagnosis or medical negligence, particularly if a patient was treated  
251 for one disease, such as tuberculosis, but was later found through autopsy to have died from a  
252 different disease process. We addressed this issue by clarifying the scope of the study,  
253 emphasizing that the primary aim is to advance medical understanding and not to provide  
254 evidence for malpractice litigation. We also revised our communication and consent documents  
255 to state that the clinical research findings should not be used in a court of law to ensure that  
256 participant families were not engaging in this research program for purposes of litigation. We  
257 reinforced the role of autopsies in improving diagnostic accuracy and healthcare quality,  
258 underlining that the study would ultimately strengthen the community's health system by  
259 providing insights into disease patterns.

260

#### 261 *Community Police Forum*

262 Discussions with the police force informed our team of the appropriate referral pathways for  
263 unnatural death reporting. Although participants are only eligible for our study if they are  
264 deemed to have died from natural causes, there may be potential cases where the study  
265 pathologist identifies findings suspicious for an unnatural cause of death. We learned the  
266 necessary steps needed to transfer the participant to police jurisdiction and amended our  
267 protocols to account for this possibility.

268

#### 269 *Local Traditional Authorities*

270 In KwaZulu-Natal, the endorsement and support of local traditional chiefs are prerequisites for  
271 community-based research, but particularly for studies addressing sensitive topics, such as  
272 postmortem examination. We approached local chiefs to obtain their input and advice on our  
273 study design. In our meetings, we described the study's objectives, potential benefits to the

274 community, and the approach we would adhere to regarding cultural practices surrounding  
275 death. Through open dialog and answering their questions, we received their approval to  
276 proceed.

277

### 278 *Funeral Home Collaboration*

279 We conducted a series of face-to-face conversations with funeral home managers and staff,  
280 which revealed insights that influenced our outreach and operational strategies. Initially, these  
281 dialogs aimed to explore the potential for partnership and gauge the level of interest in the  
282 study. However, as discussions progressed, funeral home managers expressed concern about  
283 being the primary point of contact for families to learn about the autopsy study. They stressed  
284 the need for the research team to proactively educate the community to alleviate the burden on  
285 funeral home staff of conveying sensitive information about autopsy practices. This feedback led  
286 to a strategic shift in our approach, prioritizing direct community outreach to introduce the study  
287 and its objectives before family engagement with funeral services.

288

289 Furthermore, funeral home managers were apprehensive about the legal implications of  
290 conducting autopsies on their premises. To address these concerns, we sought approval to  
291 perform autopsies within legally licensed funeral homes from representatives of the Department  
292 of Health Forensic Pathology Division and the Department of Environmental Services.

293 Additionally, we learned that among the 17 funeral home businesses in the region, the majority  
294 shared resources, with three common morgues used collectively between them. To formalize  
295 the collaboration, we developed a contract with each funeral home, detailing the relationship  
296 between AHRI and the funeral home entities. No financial incentives were offered to the funeral  
297 homes to ensure ethical integrity and prevent the coercion of program participation. Instead, we  
298 opted to rent morgue space at the standard rate, a cost equivalent to what smaller funeral  
299 businesses would incur when utilizing the morgues of larger establishments.

300

301 Through these engagements with funeral home staff, it became evident that, whereas there was  
302 an interest in medical causes of death, they felt most families seeking autopsies did so under  
303 the suspicion of unnatural causes, such as poisoning, witchcraft, or foul play. This distinction  
304 was important in tailoring our communication and consent processes to ensure that families  
305 were in line with our study goals to determine the natural causes of death in the community.

306

### 307 *Traditional Healers*

308 Recognizing the influential role of traditional medicine in the community's healthcare decisions,  
309 we engaged with traditional healers to seek their impressions and insights into an autopsy  
310 program. The traditional healers taught us more about the local community practice of  
311 ukushashazela, in which families perform a ritual involving the slaughter of a goat to “close the  
312 wounds” for a relative buried without all organs or tissues.(19) The traditional healers advised  
313 that autopsies could be culturally accepted if provisions for ukushashazela were available to  
314 families who practice it. Considering this, we refined our autopsy communication and consent  
315 processes to mention such cultural practices. After addressing their concerns and providing  
316 detailed explanations about the study, we sought support from traditional healers in  
317 recommending autopsies to appropriate families, with confidence that our procedures would be  
318 respectful of local customs.

319

### 320 *Healthcare Providers*

321 We also conducted a series of group discussions and educational sessions with nurses,  
322 community healthcare workers, peer navigators, and physicians affiliated with AHRI and the  
323 Department of Health. This included engagement with 231 healthcare providers affiliated with  
324 11 primary health care clinics and the district referral hospital. These sessions served to inform

325 healthcare professionals about the study procedures, answer any queries, and encourage them  
326 to refer interested families who met the criteria to our study team.

327

### 328 *Civil Society Leaders*

329 Within the uMkhanyakude district, civil society meetings include diverse representations of  
330 community leaders. These include members from the Department of Health, social workers,  
331 Non-Governmental Organization (NGO) representatives, and District and Local AIDS Council  
332 members. These meetings served to further disseminate the objectives of the pathologic  
333 autopsy study and receive approval for study implementation.

334

### 335 **Community Engagement and Outreach**

336 The above partner meetings helped to inform a comprehensive community outreach and  
337 sensitization plan. Goals for the program included informing the public about 1) the value of  
338 cause of death determination both individually and for the community; 2) the steps, nature, and  
339 timing of autopsy procedures; and 3) contact information for interested parties. We  
340 disseminated the program in the following ways:

341

#### 342 *Entertainment-Education Road Shows*

343 The study team participated in the HDSS monthly road shows that combine education with  
344 entertainment, a method that has proven effective in previous AHRI studies. These events  
345 allowed direct interaction between the research team and members of the community,  
346 facilitating a dynamic exchange of information. The road shows were designed to be engaging  
347 and informative, covering specifics of the autopsy study procedures, including data collection  
348 processes and how results would be disclosed to participant families.

349

#### 350 *Radio Broadcasts*

351 To extend our reach across the HDSS community, we partnered with two local radio stations,  
352 broadcasting a 30-second informational clip inviting listeners to tune into an hour-long program.  
353 These sessions, led by the study's project coordinator in isiZulu, were scheduled regularly and  
354 allowed us to address community questions in real time. Many of the questions reflected  
355 community beliefs and concerns already raised during the CAB meetings.

356

### 357 *Community dialogs*

358 The Public Engagement Unit at AHRI conducts community dialogs in isiZulu to address myths  
359 and concerns regarding research activities within the HDSS. The dialogs are scheduled to align  
360 with the HDSS's surveys, targeting areas where surveys are to be conducted the following  
361 week. Although all community members from these areas are invited to participate, typically  
362 only 10-20 members attend the discussions, along with the project coordinator from the  
363 Pathologic Autopsy Program. These gatherings take place in accessible outdoor spaces or  
364 homesteads. The number of dialogs held is contingent upon the size of the area and the nature  
365 of the concerns raised, ranging from two to three sessions.

366

### 367 *Verbal Autopsy Infrastructure*

368 We leveraged the existing verbal autopsy infrastructure for reporting demographic events. For  
369 example, any individual may call AHRI to report births, deaths, migrations, etc., within the  
370 HDSS. Individuals who report these events to the AHRI call center are offered airtime  
371 reimbursements, ensuring that the cost does not hinder communication. We integrated the  
372 pathologic autopsy program into this established system to enable more rapid notification by our  
373 project coordinator. Our coordinator would then reach out to the notifying individual and contact  
374 the relatives with a recent death to inform them about the autopsy study and assess eligibility.  
375 This enabled more targeted information sharing to families who may be interested in the  
376 autopsy program.

377

### 378 *Dissemination of Autopsy Program Educational Adverts*

379 Our outreach materials included flyers and posters (**Figure 2, Figure 3**). Flyers are distributed  
380 to the community at the Department of Health clinics, community events, and funeral homes.  
381 Posters, which more comprehensively detail the autopsy process, were strategically placed  
382 within funeral homes to educate and inform visitors.

383

### 384 **Video-Based Consent Process**

385 We planned to obtain consent through in-depth face-to-face discussions, ensuring that families  
386 were well informed before participation. We developed a consent video presented in isiZulu,  
387 featuring the project coordinator, the Community Advisory Board Chair, the study pathologist,  
388 and the study prosector. This five-minute video (**Supplemental 1**) proved to be a crucial tool for  
389 clearly explaining the study's goals, the pathologic autopsy and verbal autopsy components,  
390 and the tissue storage process in our pilot trial. The film's effectiveness in conveying complex  
391 information succinctly made it an invaluable asset not only during the consent process but also  
392 during partner meetings.

393

### 394 **Feedback from individuals with recently deceased family members who declined** 395 **participation.**

396 As community knowledge about the autopsy program increased, several families were referred  
397 to discuss the procedure. Initially, the first 10 families declined to consent for autopsy. Reasons  
398 for declined enrollment included the following: 1) a death certificate had already been issued,  
399 and the family was content with the diagnosis; 2) the timing of the autopsy procedure, which  
400 was conducted weekly on Mondays or Tuesdays by our study pathologist, did not align with the  
401 funeral ceremony preparations; 4) family members were not the next of kin, or they requested  
402 permission and consensus from others; and 5) the return of results 12-16 weeks later was



403 deemed untimely. To address these barriers, we modified our study approach. For example, we  
404 partnered with a private physician in the community responsible for completing death certificates  
405 to add preliminary data found on autopsy examination to the death forms. We have expanded  
406 the number of days the study pathologist is available to conduct autopsies to facilitate family  
407 preferences for funeral proceedings and funeral home obligations. Finally, in our protocol, we  
408 sought written consent from the designated next of kin but strongly encouraged the consensus  
409 of the entire family to maximize joint decision making.

410

## 411 **Discussion**

412 This work highlights the importance of community engagement and partner feedback in the  
413 establishment of a community-based pathologic autopsy program within rural South Africa.  
414 Proactive and culturally sensitive strategies, codeveloped with community members and civic  
415 leaders, are requisite in areas where autopsies are not commonly conducted due to  
416 sociocultural, religious, and logistical barriers. Our meetings with partners provided a number of  
417 key insights, such as the need for referral pathways that are independent of funeral homes,  
418 educational materials that address concerns among community members, the need to integrate  
419 a multistep process to confirm family motivations for pursuing autopsy without suspected foul  
420 play, the need to ensure the alignment of autopsies with traditional practices (in our case with  
421 that of ukushashazela), and the ability to provide flexibility for when the procedure is conducted  
422 to align the procedure timing with planned funeral proceedings.

423

424 This work was motivated by reports from the region about hesitancy surrounding  
425 pathologic autopsy procedures. For example, research in Tanzania found that community  
426 attitudes toward autopsies were influenced by beliefs about witchcraft and concerns regarding  
427 the disturbance of the body after death, akin to feedback raised during our partner  
428 interviews.(20) In Zambia, one study demonstrated that families often decline neonatal

429 autopsies, with 43% citing them as futile since the diagnosis should have occurred prior to  
430 death, rendering postmortem findings of no benefit.(21) Additionally, more than one-quarter of  
431 those who refused did so because a death certificate had already been issued and  
432 arrangements to transport the body had been made and could not be delayed.(21) In contrast, a  
433 study conducted across Gabon, Kenya, Mali, Mozambique, and Pakistan found that interviews  
434 with family members in the first 24 hours after death were easier to conduct than those at later  
435 stages.(22) This group also found that the acceptability of an autopsy program required  
436 early community education and staff preparedness to be able to appropriately address  
437 emotional trauma and grief while ensuring a comprehensive consent process. Based on this  
438 information, we sought to meet early and often with relevant community members to understand  
439 and address concerns they may have and seek solutions to garner support.

440  
441 Our experience provides a roadmap for researchers and healthcare practitioners aiming to  
442 implement similar community-based pathologic autopsy programs in other settings. We took  
443 away three key lessons from our program development through engagement with a diverse set  
444 of community members, including the Department of Health, local traditional leaders, community  
445 advisory boards, the police force, civic society members, healthcare workers, and funeral home  
446 personnel. First, engaging with community members to understand cultural beliefs and  
447 misconceptions about autopsy is an instrumental first step. While other studies have explored  
448 perspectives from the relatives of recently deceased persons, (22-26) we started by holding  
449 group discussions with community members not currently experiencing bereavement to gain an  
450 understanding of traditional and cultural practices, appropriate messaging techniques, and delve  
451 into the nuances of burial practices. Feedback indicated that the timing of the autopsy  
452 procedures was critical. Aligning the study to accommodate local burial customs and family  
453 preferences for funeral proceedings led to expanding the availability of the study pathologist and  
454 adjusting the consent process to encourage family consensus. Furthermore, as autopsy

455 programs are not successful without input and buy-in from local traditional and civic society  
456 groups, scientific modifications may be required after their perspective is gained. Our  
457 experience underscores this point; adaptation of our communication and consent processes  
458 was necessary after gaining a deeper understanding of ukushashazela. Incorporating this  
459 cultural aspect in our approach helps ensure that the program is respectful of and responsive to  
460 the values and beliefs of the community we aimed to serve.

461  
462 Second, because the legal and regulatory frameworks governing postmortem examinations vary  
463 significantly by country and jurisdiction,(27) meeting with legal experts and local health  
464 authorities is essential to ensure compliance with autopsy procedures. We were first aware of  
465 these legal requirements through funeral home engagements. Autopsy studies using funeral  
466 home facilities have previously been met with challenges.(28) The private business owners  
467 raised concerns about legal implications, which ultimately led us to formalize business  
468 contracts, rent morgue space at standard rates, and engage with the Department of  
469 Environmental Services to oversee facility compliance to ensure that the funeral home facilities  
470 met standards for autopsy. We also engaged the Forensic Pathology Division of the Department  
471 of Health and police force to ensure that our protocols aligned with the policies for unnatural  
472 death referrals.

473  
474 Finally, community sensitization is a prerequisite step ahead of community-based autopsy  
475 programs. Promoting community buy-in requires transparent two-way communication about the  
476 program's goals, processes, and potential benefits. We employed a multifaceted outreach  
477 strategy with the goal of broadly reaching all members of the target population, including  
478 entertainment-education road shows, radio broadcasts, community dialogs, and the use of  
479 video-based consent processes. The use of video in the informed consent process for medical  
480 research, including autopsy studies, offers notable benefits compared to traditional text-based

481 approaches. Video-based consent has been shown to lead to enhanced enrollment and greater  
482 diversity among study participants.(29) This finding suggests that video consent can assist in  
483 making complex medical information more accessible and understandable. For our autopsy  
484 consent process, we provide a clear explanation of the procedures through video aids to dispel  
485 misconceptions that could impede consent. The video details the procedure comprehensively  
486 (albeit without images of a deceased person) and features key individuals such as the  
487 pathologist and project coordinator to humanize and clarify the process for potential family  
488 members. Additionally, by following an example family through the stages of the autopsy  
489 process, the videos attempt to offer a relatable and transparent narrative that can be particularly  
490 beneficial when overcoming language barriers or emotionally sensitive subject matter.

491

## 492 **Conclusions**

493 The establishment of a community-based pathologic autopsy program requires a  
494 comprehensive community-engaged approach. By following this structured roadmap,  
495 researchers can navigate the complexities of implementing similar programs, thereby enhancing  
496 mortality data and informing public health strategies in underserved populations. Our experience  
497 illustrates that with careful planning, respectful engagement, and adaptability, it is possible to  
498 overcome barriers to implementing an autopsy program and contribute valuable insights into the  
499 causes of death in communities where such data are scarce.

500

## 501 **Declarations**

### 502 **Ethics Approval and Consent to Participate**

503 This study received ethical approval from the Biomedical Research Ethics Committee (BREC) at  
504 the University of KwaZulu-Natal (reference: BE290/16). The committee endorsed the publication  
505 of our manuscript that reports feedback from stakeholder engagements as it aligns with the  
506 approved protocols and enhances the social value of our work, with no further action required

507 from the Principal Investigator to obtain written informed consent before publication. Therefore,  
508 written informed consent was not obtained from all stakeholder participants. This approach was  
509 approved by the BREC under specific conditions that ensure compliance with ethical standards.

510

#### 511 **Consent for Publication**

512 Written consent for publication of Supplemental 1 Consent Video was obtained from all  
513 participants.

514

#### 515 **Availability of data and materials**

516 Data sharing is not applicable to this article, as no datasets nor interview guides were generated  
517 or analyzed during the current study.

518

#### 519 **Competing Interests**

520 CI received grant funding from Gilead Sciences paid to his Institution for investigator-sponsored  
521 research. CI received support from the International Vaccine Institute to attend the Indo-Pacific  
522 Climate Resilience Forum. All other authors declare that they have no competing interests.

523

#### 524 **Funding**

525 The pathologic autopsy program is funded by the Wellcome Leap Delta Tissue Program. This  
526 research was also supported by the Fogarty International Center (D43 TW010543), National  
527 Institute of Allergy and Infectious Diseases (T32 AI007433), and the National Heart, Lung, Blood  
528 Institute (K24 HL166024) of the National Institutes of Health. This research and the HDSS are  
529 funded in part by Wellcome (Grant number Wellcome Strategic Core award: 201433/Z/16/A)  
530 and the DSI-SAMRC South African Population Research Infrastructure Network (SAPRIN). For  
531 the purpose of open access, the author has applied a CC BY public copyright license to any  
532 Author Accepted Manuscript version arising from this submission. The contents of this

533 manuscript are solely the responsibility of the authors and do not necessarily represent the  
534 official views of the funders. The funders had no role in the conceptualization, design, data  
535 collection, decision to publish, or preparation of the manuscript.

536

#### 537 **Authors' contributions**

538 GS, AC, TN, and NG conducted the partner engagement and community outreach activities.

539 GS, AC, TN, AG, EW, CI, KH, AS, and MS contributed to the design of the study. AS obtained  
540 funding for the program. All the authors have read and approved the final manuscript.

541

#### 542 **Acknowledgments**

543 The authors would like to thank all the community partners and families who provided their  
544 feedback on the development of this study.

**Table 1: Partner Engagement and Protocol Adaptations in Community-Based Pathologic Autopsy Program**

| <b>Key Entity/Partner</b>         | <b>Topic Areas Covered</b>                                                                                                | <b>Key Lessons Learned</b>                                                                                                                                    | <b>Implications and Protocol Adaptation</b>                                                                                                                                            |
|-----------------------------------|---------------------------------------------------------------------------------------------------------------------------|---------------------------------------------------------------------------------------------------------------------------------------------------------------|----------------------------------------------------------------------------------------------------------------------------------------------------------------------------------------|
| Community Advisory Board (CAB)    | Burial practices<br>Beliefs about autopsy<br>Cultural appropriate messaging                                               | Burial within ~7 days of death<br>Witchcraft beliefs<br>Misconception is that forensic autopsies remove organs for traditional medicine, replaced with cotton | Ensured cultural sensitivity in outreach strategies, clarified medical objectives of autopsies, refined communication strategies to address misconceptions forthright                  |
| Department of Health              | Distinguishing between forensic and natural death policies<br>Trust of healthcare providers<br>Medical-legal implications | Need to align with public health goals and regulations                                                                                                        | Confirm only natural deaths were eligible, delineated protocols to not overlap with unnatural death referrals, clarified study scope to not implicate medical malpractice              |
| Local Police Force                | Referral pathways for unnatural deaths                                                                                    | Immediate notification to police if sudden death or suspect foul play                                                                                         | Established protocol for transferring cases to police if unnatural death is suspected                                                                                                  |
| Local Traditional Authorities     | Acceptance of program                                                                                                     | Required endorsement for any study in the region                                                                                                              | Gained approval to continue with autopsy study                                                                                                                                         |
| Funeral Home Association          | Engagement and partnership<br>Use of facilities<br>Facility compliance<br>Referral strategies                             | Concerns about the role of funeral home staff communicating about autopsies, legal implications of conducting autopsies within facilities                     | Shifted to direct community outreach and community referrals instead of relying on funeral home staff to convey study, formalized collaboration through contracts, rented morgue space |
| Traditional Healers               | Acceptance of program<br>Traditional practices                                                                            | Significance of traditional ritual ukushashazela                                                                                                              | Adapted communication and consent processes to include provisions for traditional practices                                                                                            |
| Healthcare Providers' Partnership | Education of procedure benefits<br>Referral of appropriate families                                                       | Involving healthcare providers is key for broadening reach                                                                                                    | Referral pathways primarily through healthcare professionals                                                                                                                           |
| Civil Society Meeting             | Acceptance of program                                                                                                     | Required endorsement for any study in the region                                                                                                              | Gained approval to continue with autopsy study                                                                                                                                         |

## References

1. Nannan N, Bradshaw D, Laubscher R, Mazinu M, Nkwenika T, Neethling I, et al. Rapid assessment of cause-of-death data collection and public health use in South Africa. South African Medical Research Council. 2023.
2. Vos T, Lim SS, Abbafati C, Abbas KM, Abbasi M, Abbasifard M, et al. Global burden of 369 diseases and injuries in 204 countries and territories, 1990–2019: a systematic analysis for the Global Burden of Disease Study 2019. *The Lancet*. 2020;396(10258):1204-22.
3. Africa NDoHRoS. Annual Performance Plan 2021/22. 2021 (ISBN: 978-0-621-49283-5).
4. Nojilana B, Groenewald P, Bradshaw D, Reagon G. Quality of cause of death certification at an academic hospital in Cape Town, South Africa. *S Afr Med J*. 2009;99(9):648-52.
5. Yudkin PL, Burger EH, Bradshaw D, Groenewald P, Ward AM, Volmink J. Deaths caused by HIV disease under-reported in South Africa. *AIDS*. 2009;23(12):1600-2.
6. Fligner CL, Murray J, Roberts DJ. Synergism of verbal autopsy and diagnostic pathology autopsy for improved accuracy of mortality data. *Popul Health Metr*. 2011;9:25.
7. Kahn K, Tollman SM, Garenne M, Gear JS. Validation and application of verbal autopsies in a rural area of South Africa. *Trop Med Int Health*. 2000;5(11):824-31.
8. Letang E, Rakislova N, Martinez MJ, Carlos Hurtado J, Carrilho C, Bene R, et al. Minimally Invasive Tissue Sampling: A Tool to Guide Efforts to Reduce AIDS-Related Mortality in Resource-Limited Settings. *Clin Infect Dis*. 2021;73(Supplement\_5):S343-S50.
9. Wong EB, Olivier S, Gunda R, Koole O, Surujdeen A, Gareta D, et al. Convergence of infectious and non-communicable disease epidemics in rural South Africa: a cross-sectional, population-based multimorbidity study. *Lancet Glob Health*. 2021;9(7):e967-e76.
10. Gunda R, Koole O, Gareta D, Olivier S, Surujdeen A, Smit T, et al. Cohort Profile: The Vukuzazi ('Wake Up and Know Yourself' in isiZulu) population science programme. *Int J Epidemiol*. 2021.
11. Gareta D, Baisley K, Mngomezulu T, Smit T, Khoza T, Nxumalo S, et al. Cohort Profile Update: Africa Centre Demographic Information System (ACDIS) and population-based HIV survey. *Int J Epidemiol*. 2021;50(1):33-4.
12. Banyini AV, Rees D, Gilbert L. "Even if I were to consent, my family will never agree": exploring autopsy services for posthumous occupational lung disease compensation among mineworkers in South Africa. *Glob Health Action*. 2013;6:19518.
13. Collinson MA, Mudzana T, Mutevedzi T, Kahn K, Maimela E, Gomez-Olive FX, et al. Cohort Profile: South African Population Research Infrastructure Network (SAPRIN). *Int J Epidemiol*. 2021.
14. Africa DCGaTARoS. UmKhanyakude District Municipality: Profile and Analysis District Development Model 2020(01/52):24.
15. Zuma T, Wight D, Rochat T, Moshabela M. The role of traditional health practitioners in Rural KwaZulu-Natal, South Africa: generic or mode specific? *BMC Complement Altern Med*. 2016;16(1):304.
16. Puoane TR, Hughes GD, Uwimana J, Johnson Q, Folk WR. Why HIV positive patients on antiretroviral treatment and/or cotrimoxazole prophylaxis use traditional medicine: perceptions of health workers, traditional healers and patients: a study in two provinces of South Africa. *Afr J Tradit Complement Altern Med*. 2012;9(4):495-502.
17. Republic SA. South African National Health Act Government Gazette 2004;469.
18. Republic SA. Regulations Regarding the Rendering of Forensic Pathology Service Government Gazette. 2005(No. R. 341):13.
19. MDANDA MG. The Indigenous Knowledge Systems based on Religion and Healing as Encapsulated in O.E.H.M. Nxumalo and L.B.Z Buthelezi's Poetry University of KwaZulu-Natal PhD Thesis. 2010.



20. Blum LS, Karia FP, Msoka EF, Oshosen Mwanga M, Crump JA, Rubach MP. An In-Depth Examination of Reasons for Autopsy Acceptance and Refusal in Northern Tanzania. *Am J Trop Med Hyg.* 2020;103(4):1670-80.
21. Lishimpi K, Chintu C, Lucas S, Mudenda V, Kaluwaji J, Story A, et al. Necropsies in African children: consent dilemmas for parents and guardians. *Arch Dis Child.* 2001;84(6):463-7.
22. Maixenchs M, Anselmo R, Martinez Perez G, Oruko K, Agnandji ST, Angoissa Minsoko PC, et al. Socio-anthropological methods to study the feasibility and acceptability of the minimally invasive autopsy from the perspective of local communities: lessons learnt from a large multi-centre study. *Glob Health Action.* 2019;12(1):1559496.
23. Oruko K, Maixenchs M, Phillips-Howard P, Ondire M, Akelo C, Sanz A, et al. Conceptual frameworks for understanding the acceptability and feasibility of the minimally invasive autopsy to determine cause of death: Findings from the CADMIA Study in western Kenya. *PLoS One.* 2020;15(12):e0242574.
24. Sreenivas A, Jaihind Jothikaran TA, Lewis L, Mathew M. Community perceptions of postmortem examination and minimally invasive tissue sampling in neonates:a qualitative study in South India. *BMC Pregnancy Childbirth.* 2023;23(1):804.
25. Das MK, Arora NK, Kaur G, Malik P, Kumari M, Joshi S, et al. Perceptions of family, community and religious leaders and acceptability for minimal invasive tissue sampling to identify the cause of death in under-five deaths and stillbirths in North India: a qualitative study. *Reprod Health.* 2021;18(1):168.
26. Maixenchs M, Anselmo R, Sanz A, Castillo P, Macete E, Carrilho C, et al. Healthcare providers' views and perceptions on post-mortem procedures for cause of death determination in Southern Mozambique. *PLoS One.* 2018;13(7):e0200058.
27. Subedi N, Bhattarai S, Mremi A, Ntakirutimana G, Ndayisaba MC, Rugwizangoga B, et al. Building Capacity and Infrastructure at Hospitals Implementing Minimally Invasive Tissue Sampling: Experience and Lessons Learned From Nepal, Rwanda, and Tanzania. *Clin Infect Dis.* 2021;73(Suppl\_5):S396-S400.
28. Karat AS, Omar T, Tlali M, Charalambous S, Chihota VN, Churchyard GJ, et al. Lessons learnt conducting minimally invasive autopsies in private mortuaries as part of HIV and tuberculosis research in South Africa. *Public Health Action.* 2019;9(4):186-90.
29. Fanaroff AC, Li S, Webb LE, Miller V, Navar AM, Peterson ED, et al. An Observational Study of the Association of Video- Versus Text-Based Informed Consent With Multicenter Trial Enrollment: Lessons From the PALM Study (Patient and Provider Assessment of Lipid Management). *Circ Cardiovasc Qual Outcomes.* 2018;11(4):e004675.

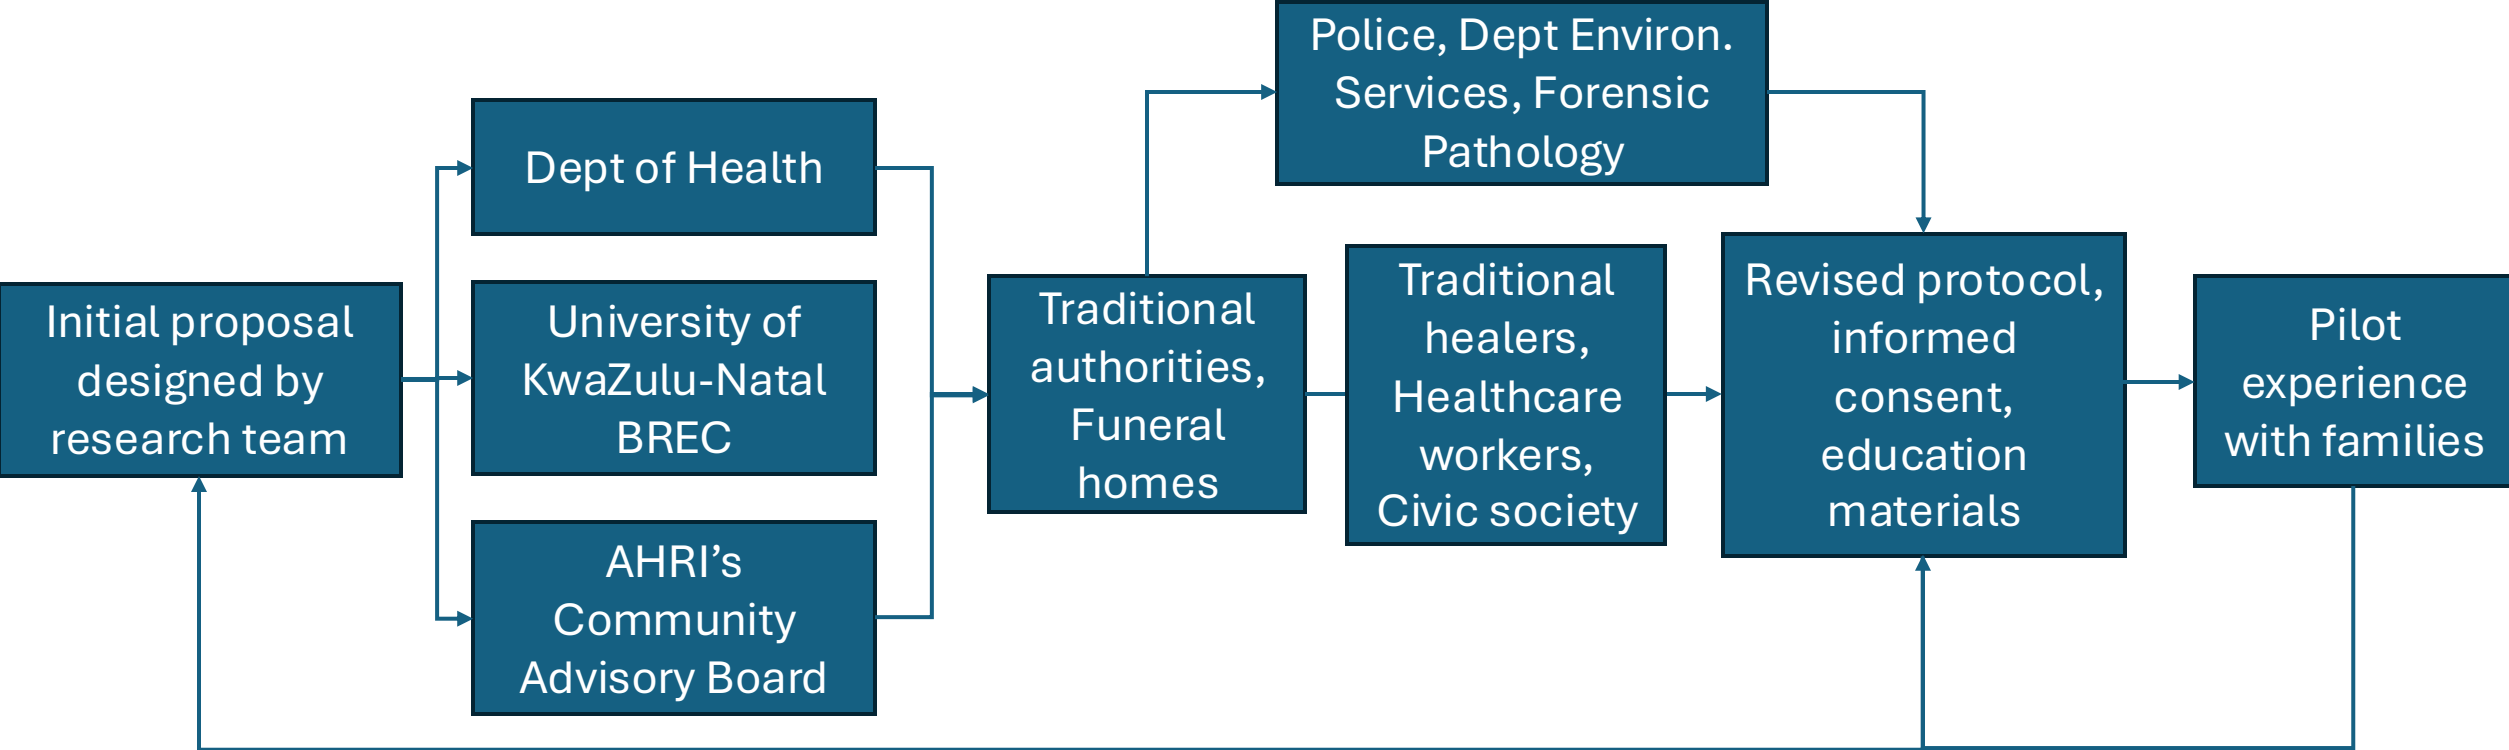

BREC: Biomedical Research Ethics Committee  
AHRI: Africa Health Research Institute

medRxiv preprint doi: <https://doi.org/10.1101/2024.11.14.24317019>; this version posted November 21, 2024. The copyright holder for this preprint (which was not certified by peer review) is the author/funder, who has granted medRxiv a license to display the preprint in perpetuity. It is made available under a [CC-BY 4.0 International license](#).

# AUTOPSY RESEARCH PROGRAM

We often lose a loved one or family member without knowing the cause of death. The death certificate indicates natural causes. But what are these natural causes? As a family you may be left with questions that are difficult to answer. This is where Africa Health Research Institute's pathologic autopsy research program comes in.

**FOR MORE INFO CONTACT GUGU SHAZI**

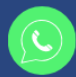

**078 251 6221 - CALLBACK-WHATS APP**

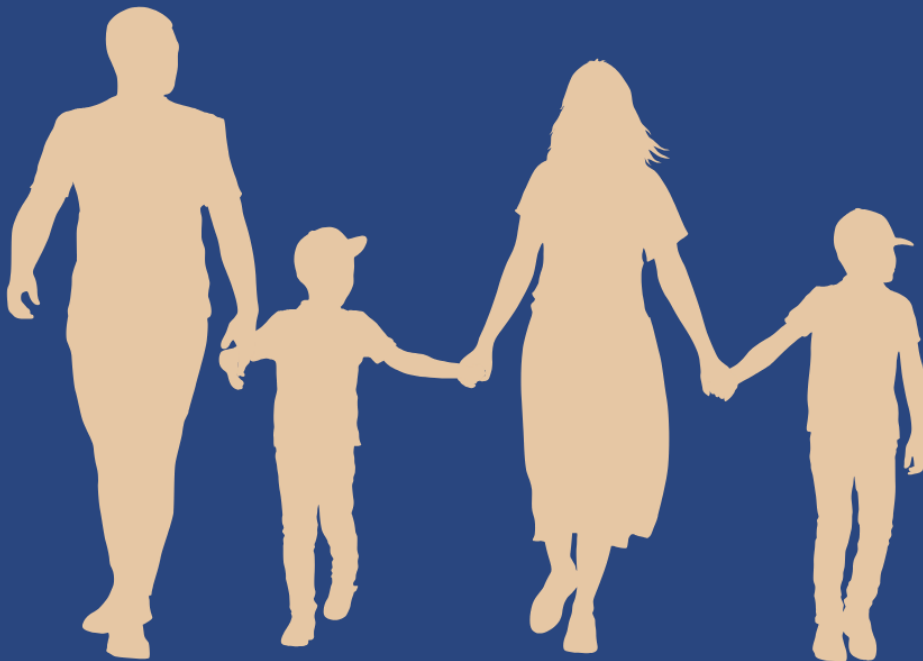

**HELP US HELP YOU FIND CLOSURE.**

# PATHOLOGIC AUTOPSY RESEARCH PROGRAM

## What is a pathologic autopsy?

A procedure done after a person dies to understand what led to the person dying.

## Why would I have this done for my loved one?

- Closure and understanding about why your relative died
- The results may have health implications for you and your family members

## Who does the procedure?

medRxiv preprint doi: <https://doi.org/10.1101/2024.11.14.24317019>; this version posted November 21, 2024. The copyright holder for this preprint (which was not certified by peer review) is the author/funder, who has granted medRxiv a license to display the preprint in perpetuity. It is made available under a [CC-BY 4.0 International license](#).

A specialist doctor, known as a pathologist.

## What is the cost?

There is no cost.

## What does the autopsy procedure entail?

- The body is examined externally and internally for evidence of what led to the **cause of death**
- Small samples from organs are taken for special testing - **not the whole organ**
- All organs are replaced and there is **no harvesting**, and no **substantial disfiguring** of the body
- Only individuals who have died of **natural** causes are eligible
- The autopsy results **cannot be used in a court of law**

## When do we receive the results?

- 90 days (three months) after the procedure
- Our team member will contact the next of kin to deliver the confidential results

## What is the goal of the autopsy research program?

- To better understand what people are dying of in this region
- This accurate information will help develop healthcare services to better respond to needs of the population
- Most importantly, it is your right to access autopsy services

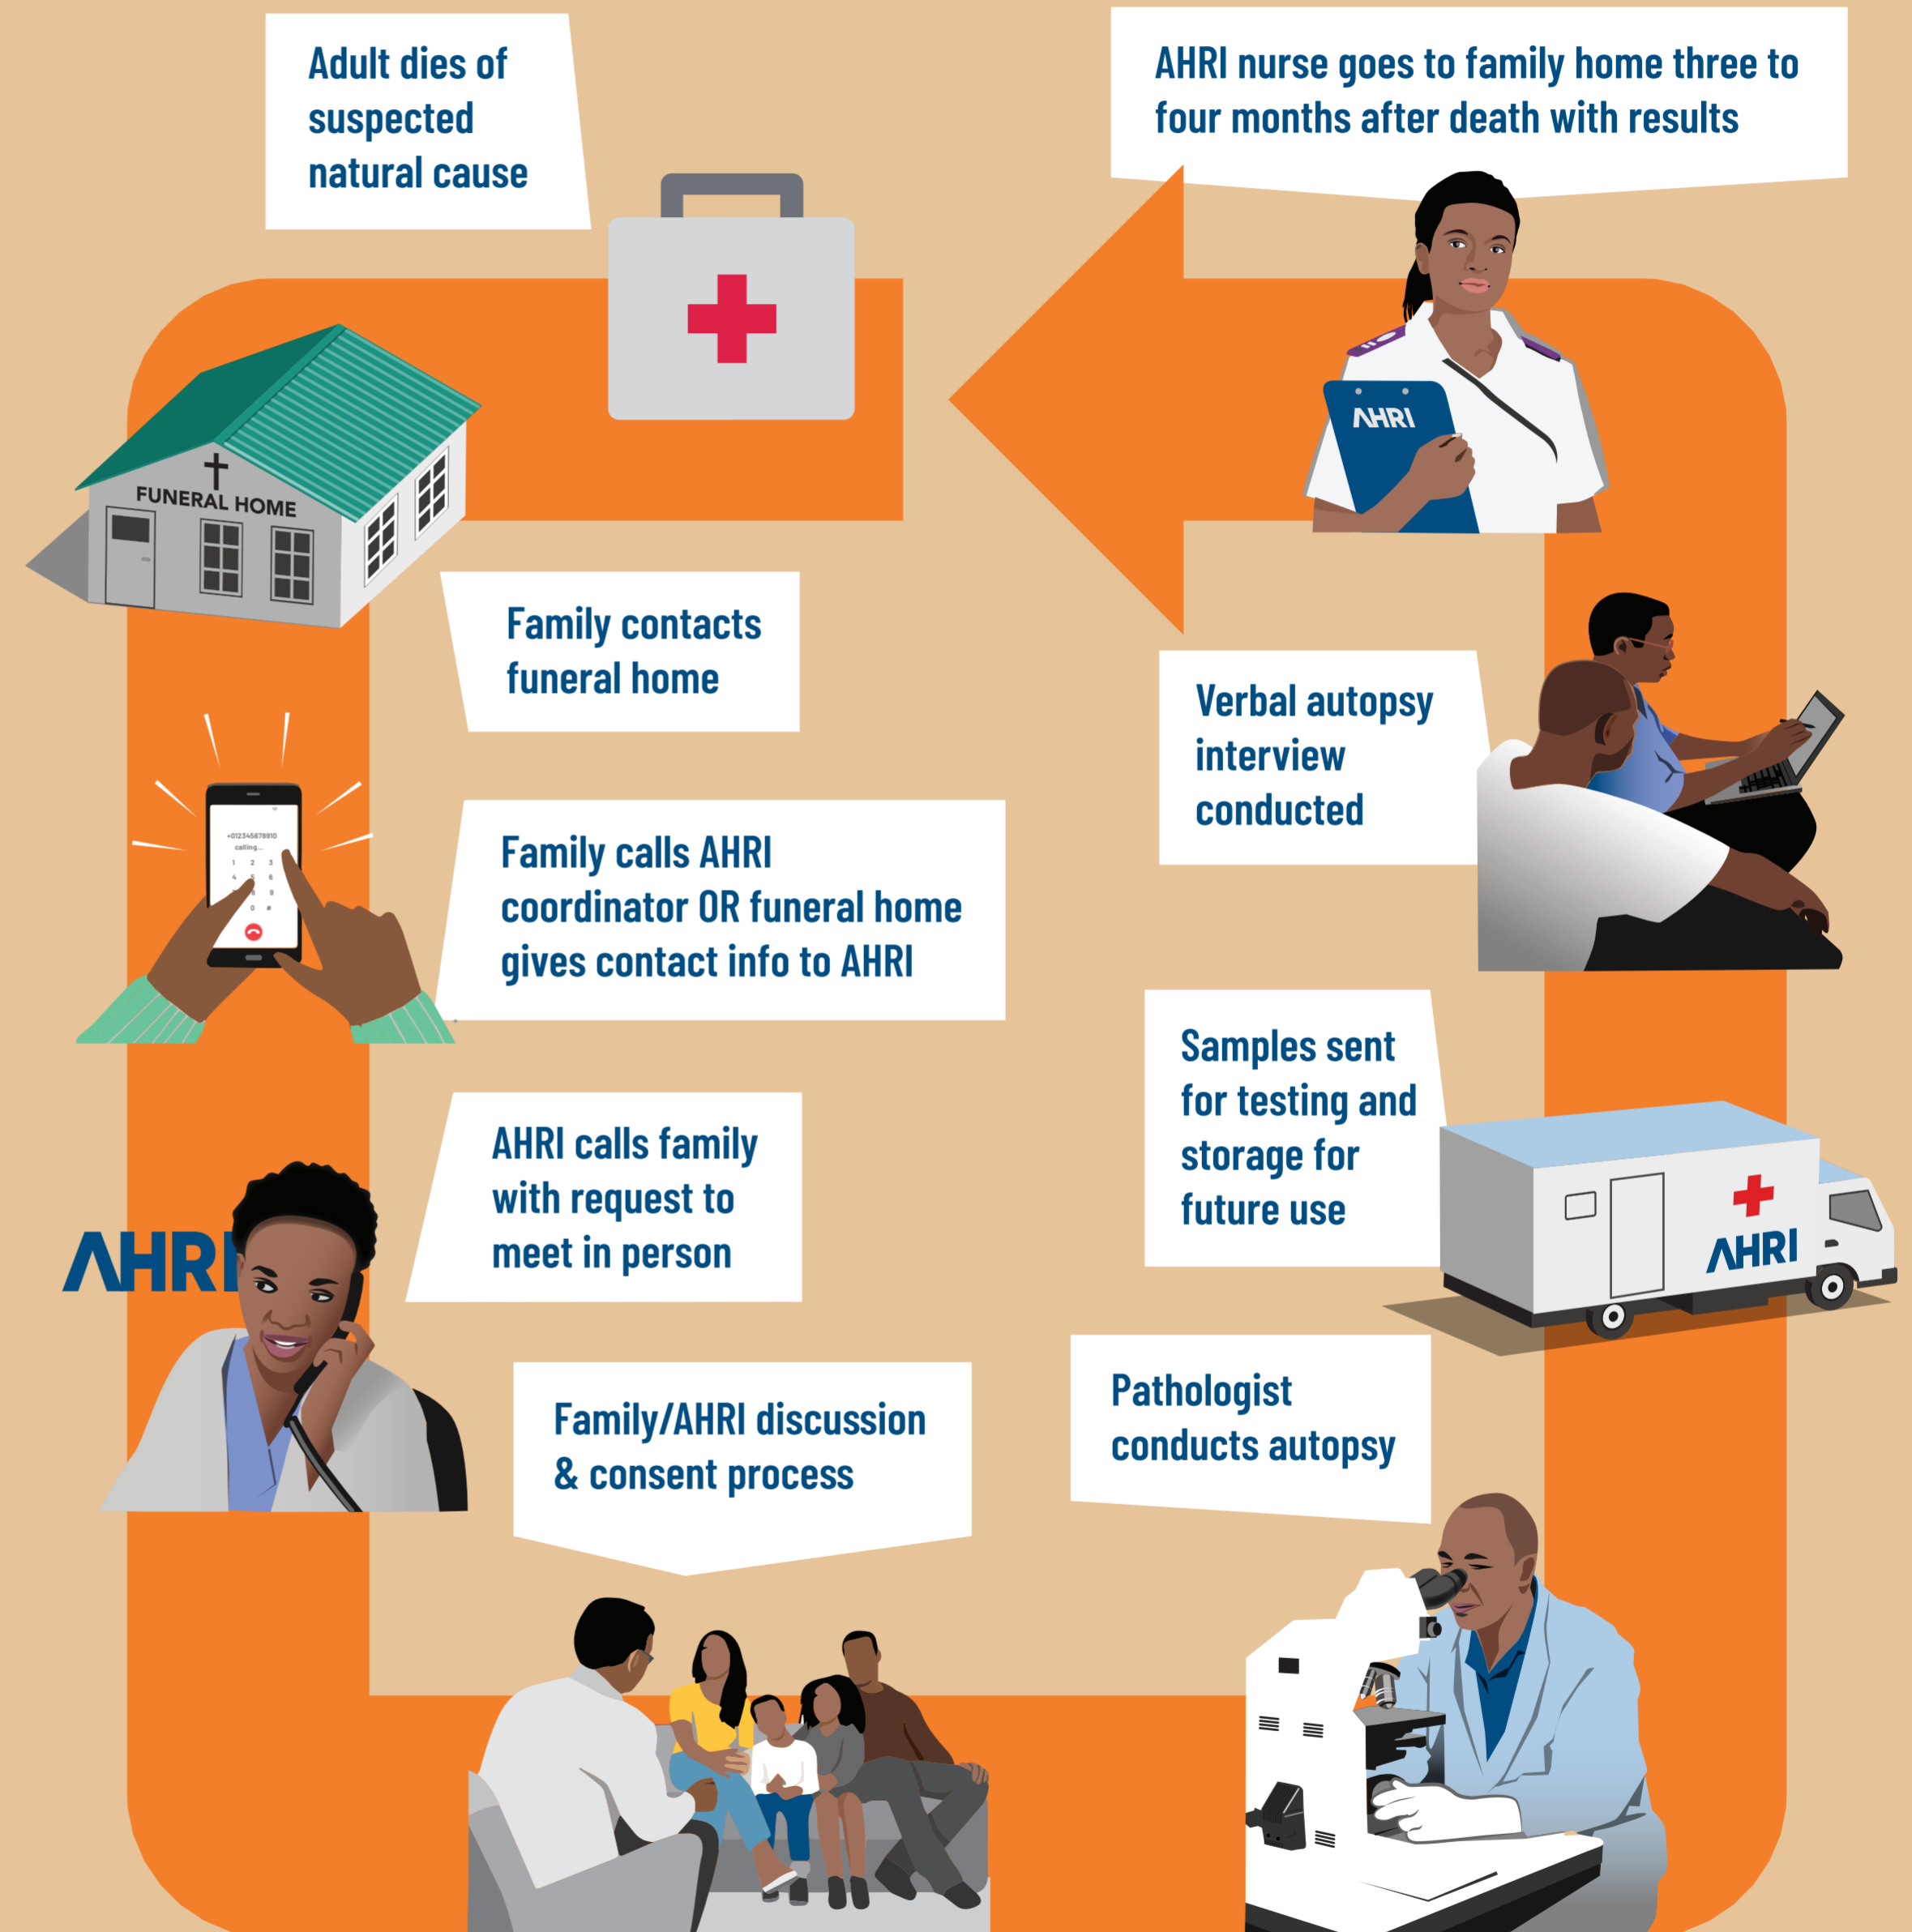

Source: https://medrxiv.org/content/10.1101/2024.11.14.24317019.full.pdf
